# Supplementary material
Source: PubMed Central journal article supplement (PMC8724330)
Supplement: 41422_2021_540_MOESM2_ESM.pdf [file 41422_2021_540_MOESM2_ESM.pdf]

# Supplementary information, Fig. S2

**a**

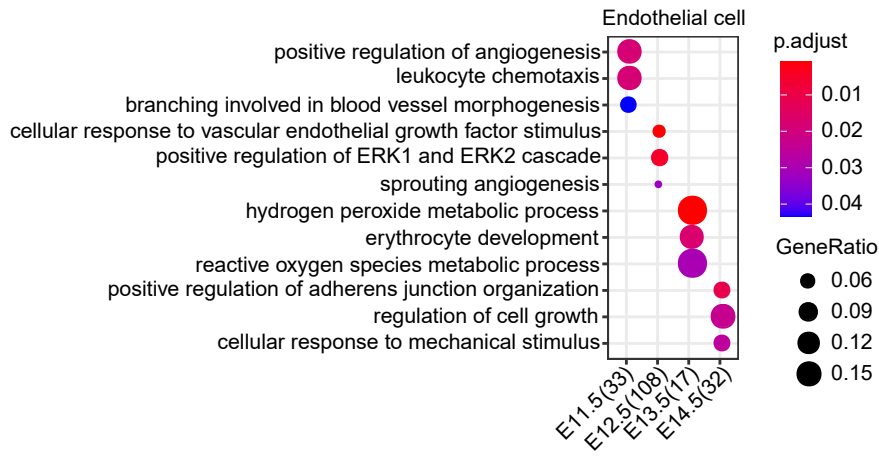

**b**

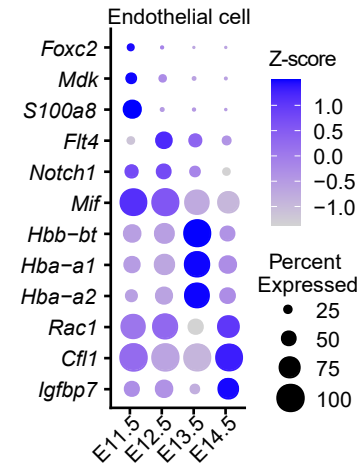

**c**

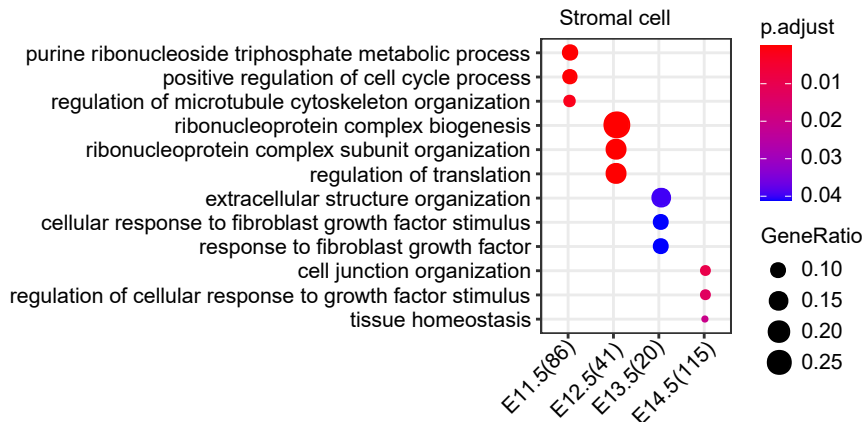

**d**

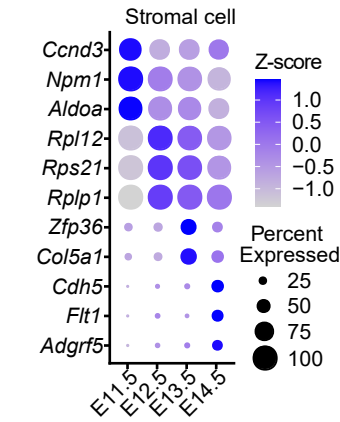

**e**

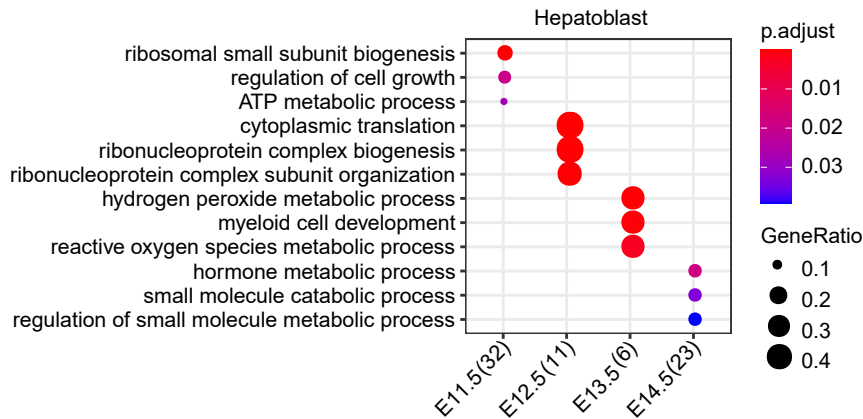

**f**

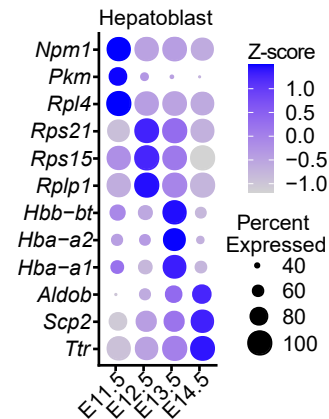

**Supplementary information, Fig. S2. Transcriptional dynamics of structural niche cells in the developing FL.** **a** Enriched gene ontology (GO) terms in endothelial cells during FL development. **b** Dot plots of enriched DEGs in endothelial cells during FL development. **c** Enriched GO terms in stromal cells during FL development. **d** Dot plots of enriched DEGs in stromal cells during FL development. **e** Enriched GO terms in hepatoblasts during FL development. **f** Dot plots of enriched DEGs in hepatoblasts during FL development.
