# Supplementary material
Source: PubMed Central journal article supplement (PMC8724330)
Supplement: 41422_2021_540_MOESM3_ESM.pdf [file 41422_2021_540_MOESM3_ESM.pdf]

Supplementary information, Fig. S3

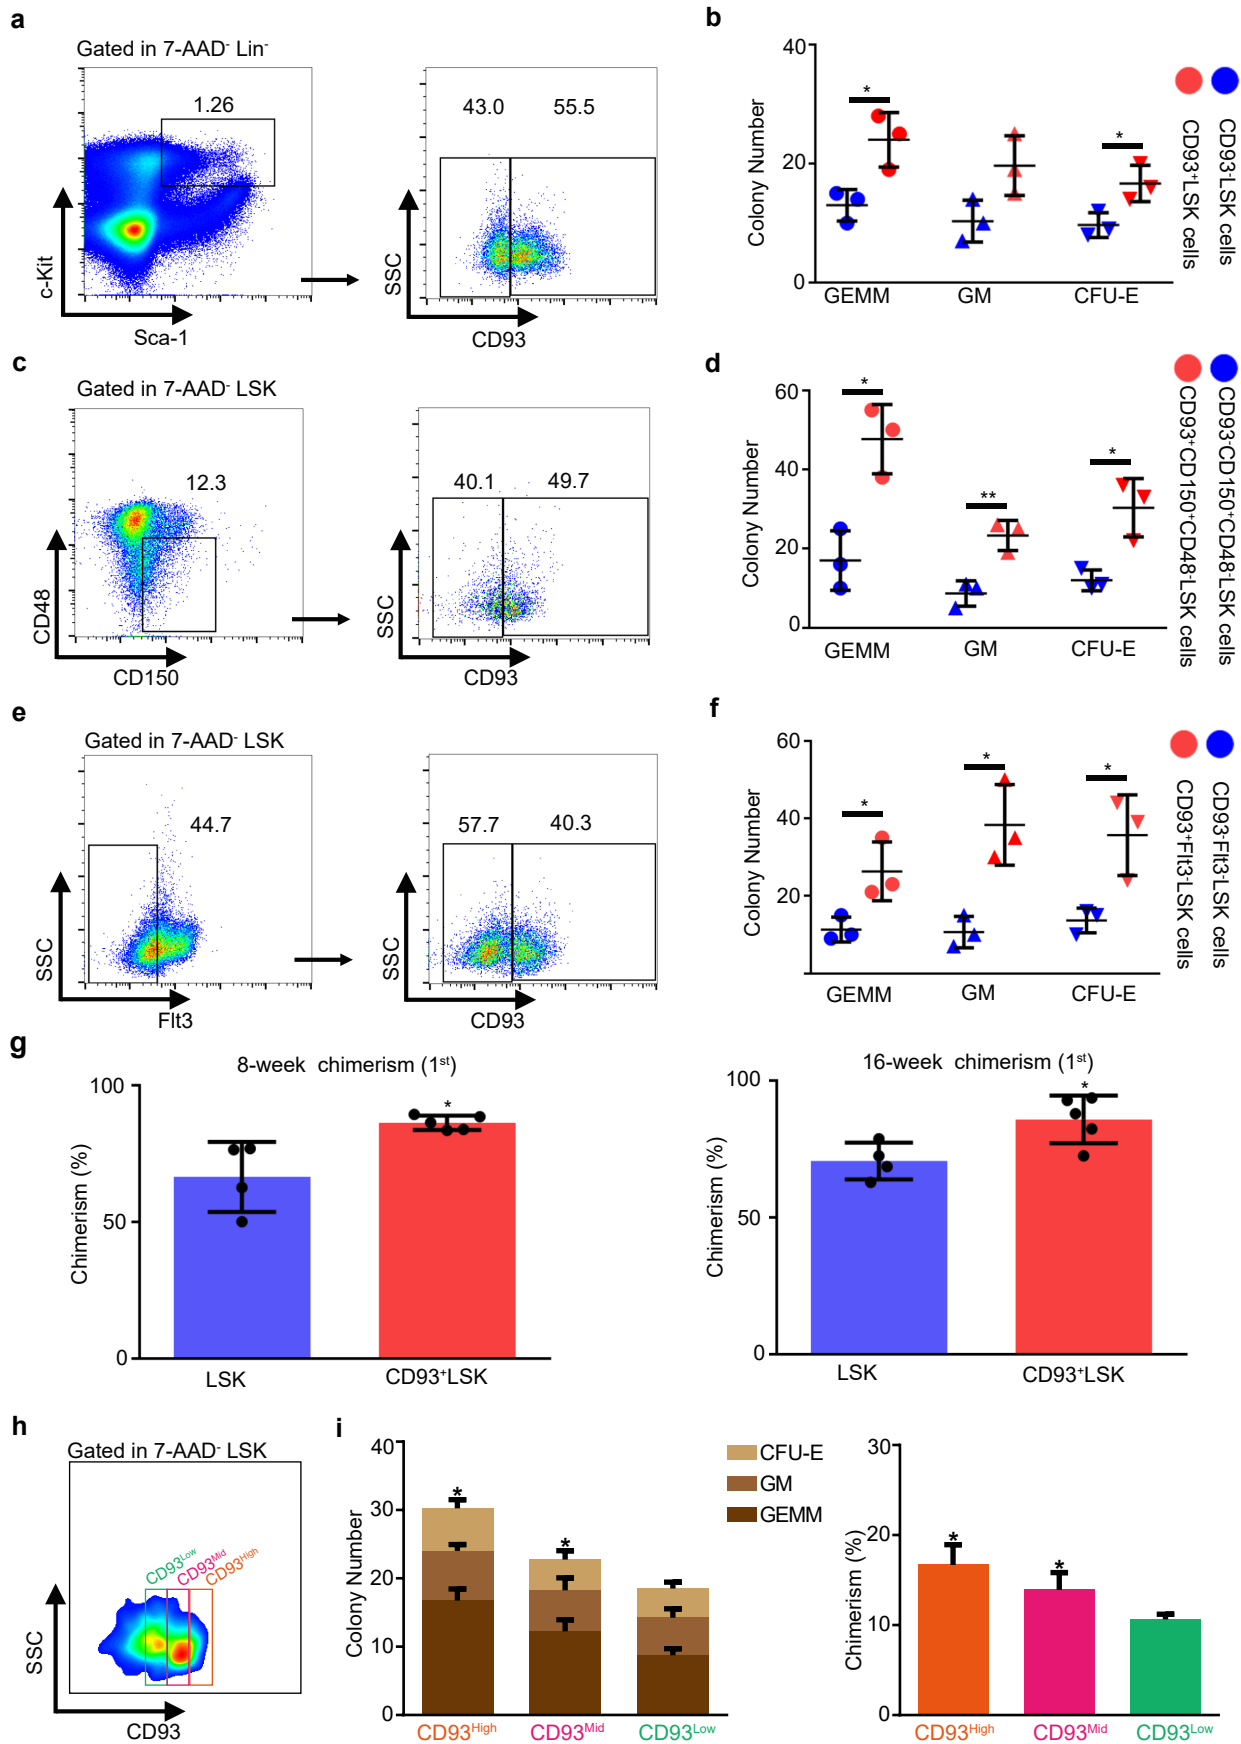

**Supplementary information, Fig. S3. CD93-enriched HSCs/MPPs exhibit enhanced stem cell properties.** **a** Flow cytometry analysis showing the proportions of CD93<sup>+</sup>LSK and CD93<sup>-</sup>LSK cells in E14.5 FL. **b** CFU culture assay to detect the colony-forming ability of CD93<sup>+</sup>LSK and CD93<sup>-</sup>LSK cells. n = 3 biological replicates. **c** Flow cytometry analysis showing the proportions of CD93<sup>+</sup>SLAM-LSK and CD93<sup>-</sup>SLAM-LSK cells in E14.5 FL. **d** CFU culture assay to detect the colony-forming ability of CD93<sup>+</sup>SLAM-LSK and CD93<sup>-</sup>SLAM-LSK cells. n = 3 biological replicates. **e** Flow cytometry analysis showing the proportions of CD93<sup>+</sup>Flt3<sup>-</sup>LSK and CD93<sup>-</sup>Flt3<sup>-</sup>LSK cells in E14.5 FL. **f** CFU culture assay to detect the colony-forming ability of CD93<sup>+</sup>Flt3<sup>-</sup>LSK and CD93<sup>-</sup>Flt3<sup>-</sup>LSK cells. n = 3 biological replicates. **g** Donor-derived chimerism in the peripheral blood (PB) of recipients at 8 weeks and 16 weeks after primary transplantation using CD93<sup>+</sup>LSK and LSK cells. n > 3 biological replicates. **h** Flow cytometry analysis showing the proportion of CD93<sup>High-</sup>, CD93<sup>Mid-</sup>, CD93<sup>Low</sup> LSK cells in E14.5 FL. **i** CFU culture assay to detect the colony-forming ability of CD93<sup>High-</sup>, CD93<sup>Mid-</sup> and CD93<sup>Low</sup> LSK cells in E14.5 FL (left). n > 3 biological replicates. Donor-derived chimerism in the peripheral blood (PB) of recipients at 4 weeks after primary transplantation using CD93<sup>High-</sup>, CD93<sup>Mid-</sup> and CD93<sup>Low</sup> LSK cells (right). n = 3 biological replicates. The statistical results are presented as mean ± SEM. Student's t test: \*, *P* < 0.05; \*\*, *P* < 0.01.
