# Supplementary material
Source: PubMed Central journal article supplement (PMC8724330)
Supplement: 41422_2021_540_MOESM4_ESM.pdf [file 41422_2021_540_MOESM4_ESM.pdf]

## Supplementary information, Fig. S4

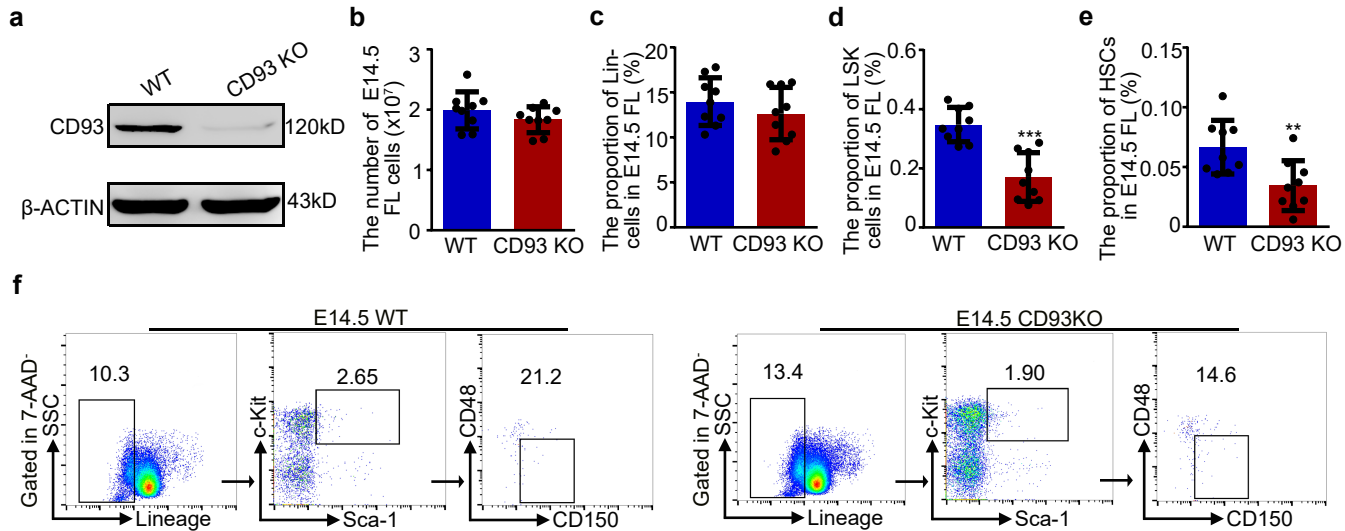

**Supplementary information, Fig. S4. CD93 is required for FL HSC/MPP development. a**

The protein level of CD93 in the E14.5 WT and CD93 KO FL examined by western blotting. **b**

Total cellularity of E14.5 FL in WT and CD93 KO mice.  $n > 3$  biological replicates. **c** The

proportion of E14.5 FL Lineage<sup>-</sup> (Lin<sup>-</sup>) cells in WT and CD93 KO mice.  $n > 3$  biological

replicates. **d** The proportion of E14.5 FL LSK cells in WT and CD93 KO mice.  $n > 3$  biological

replicates. **e** The proportion of E14.5 FL HSCs (SLAM-LSK cells) in WT and CD93 KO mice.

$n > 3$  biological replicates. **f** Flow cytometry analysis showing the proportions of E14.5 FL Lin<sup>-</sup>,

LSK, SLAM-LSK cells in in WT and CD93 KO mice. The statistical results are presented as

mean  $\pm$  SEM. Student's t test: \*\*,  $P < 0.01$ ; \*\*\*,  $P < 0.001$ .
