# Supplementary material
Source: PubMed Central journal article supplement (PMC8724330)
Supplement: 41422_2021_540_MOESM5_ESM.pdf [file 41422_2021_540_MOESM5_ESM.pdf]

Supplementary information, Fig. S5

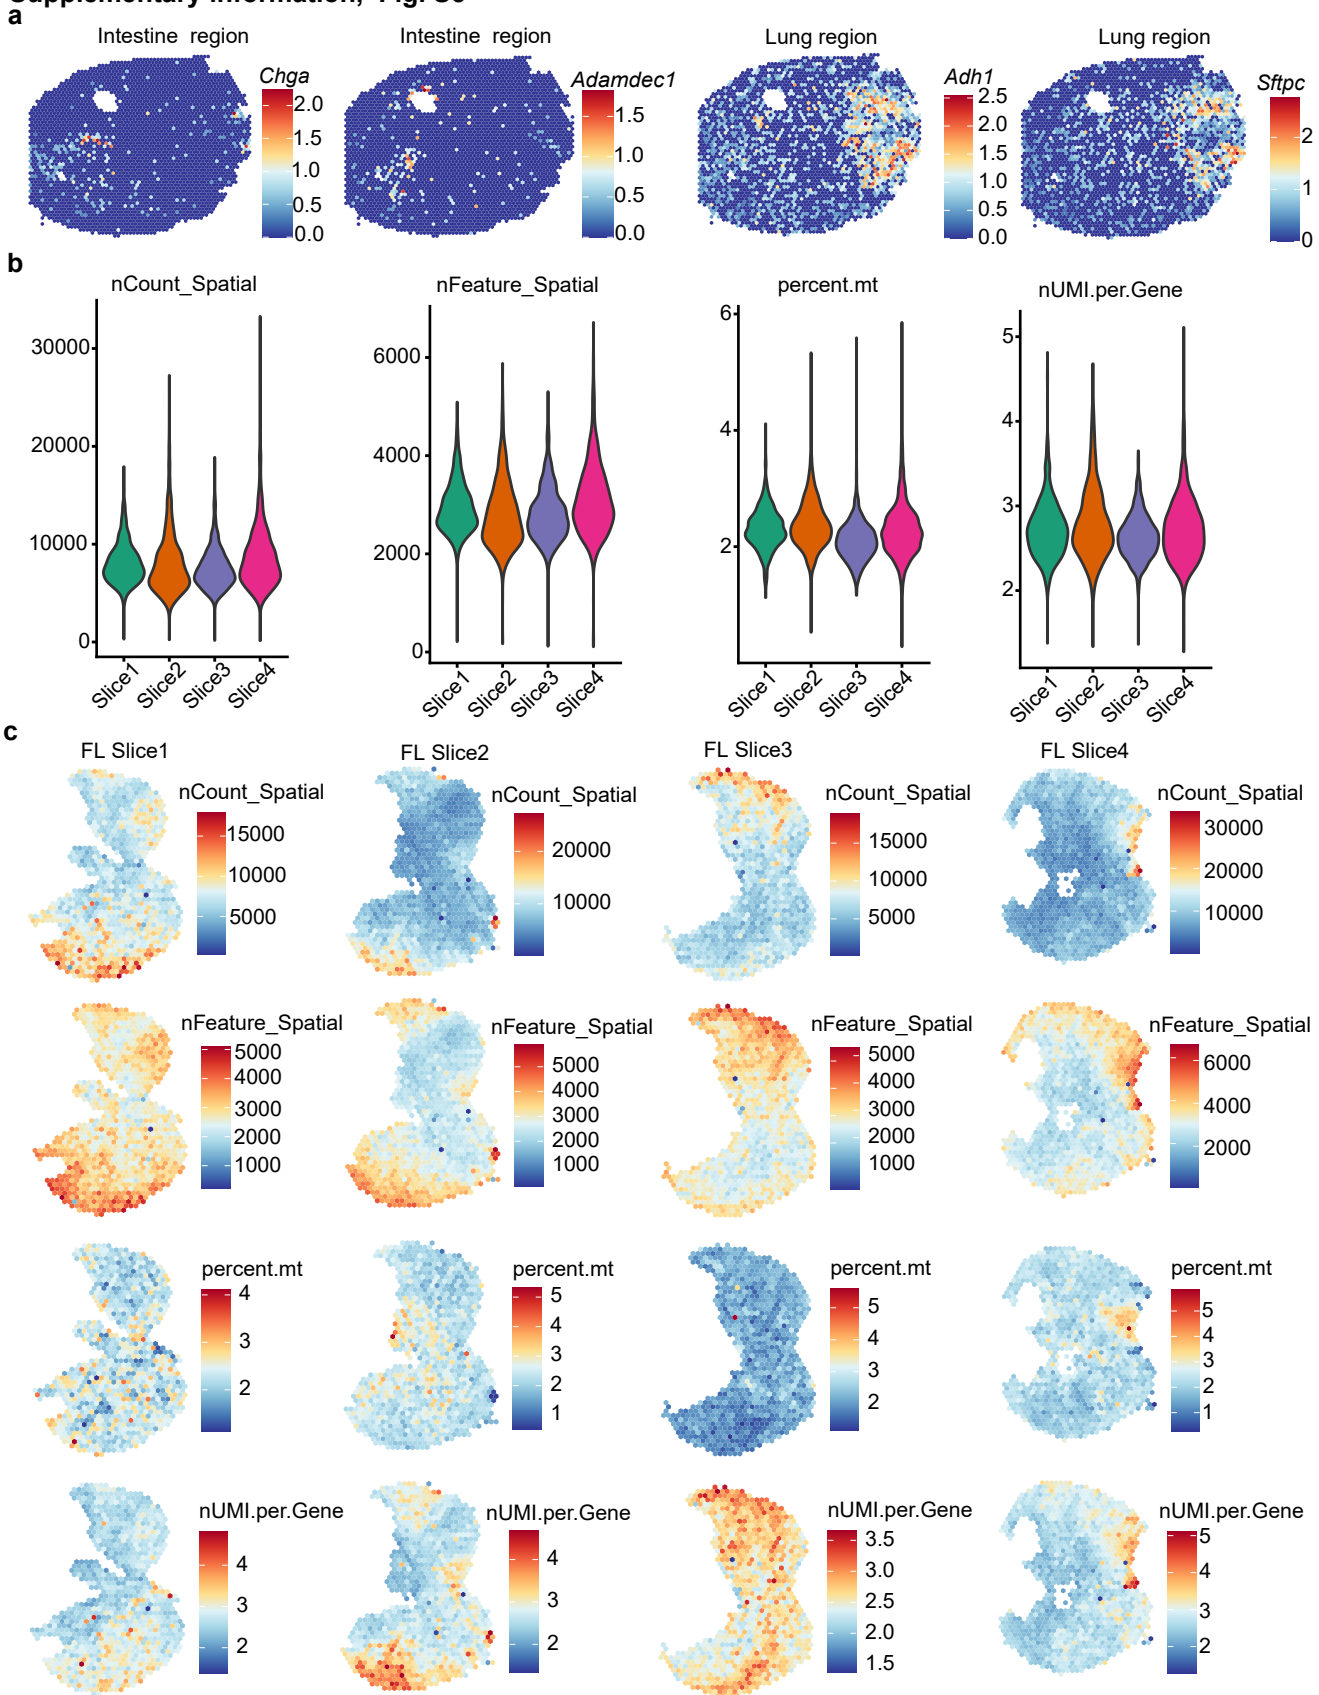

**Supplementary information, Fig. S5. Quality control of spatial transcriptomics data. a**

Expression pattern of lung region markers (*Adhl* and *Sftpc*) and intestine region marker (*Chga* and *Adamdec1*) in E14.5 embryo tissue sections. **b** Violin plots showing the numbers of transcripts, numbers of genes, mitochondria count percentage, and UMI per gene of FL spots. **c** Spatial feature plots showing the numbers of transcripts, numbers of genes, mitochondria count percentage, and UMI per gene of FL spots.
