# Supplementary material
Source: PubMed Central journal article supplement (PMC8724330)
Supplement: 41422_2021_540_MOESM6_ESM.pdf [file 41422_2021_540_MOESM6_ESM.pdf]

Supplementary information, Fig. S6

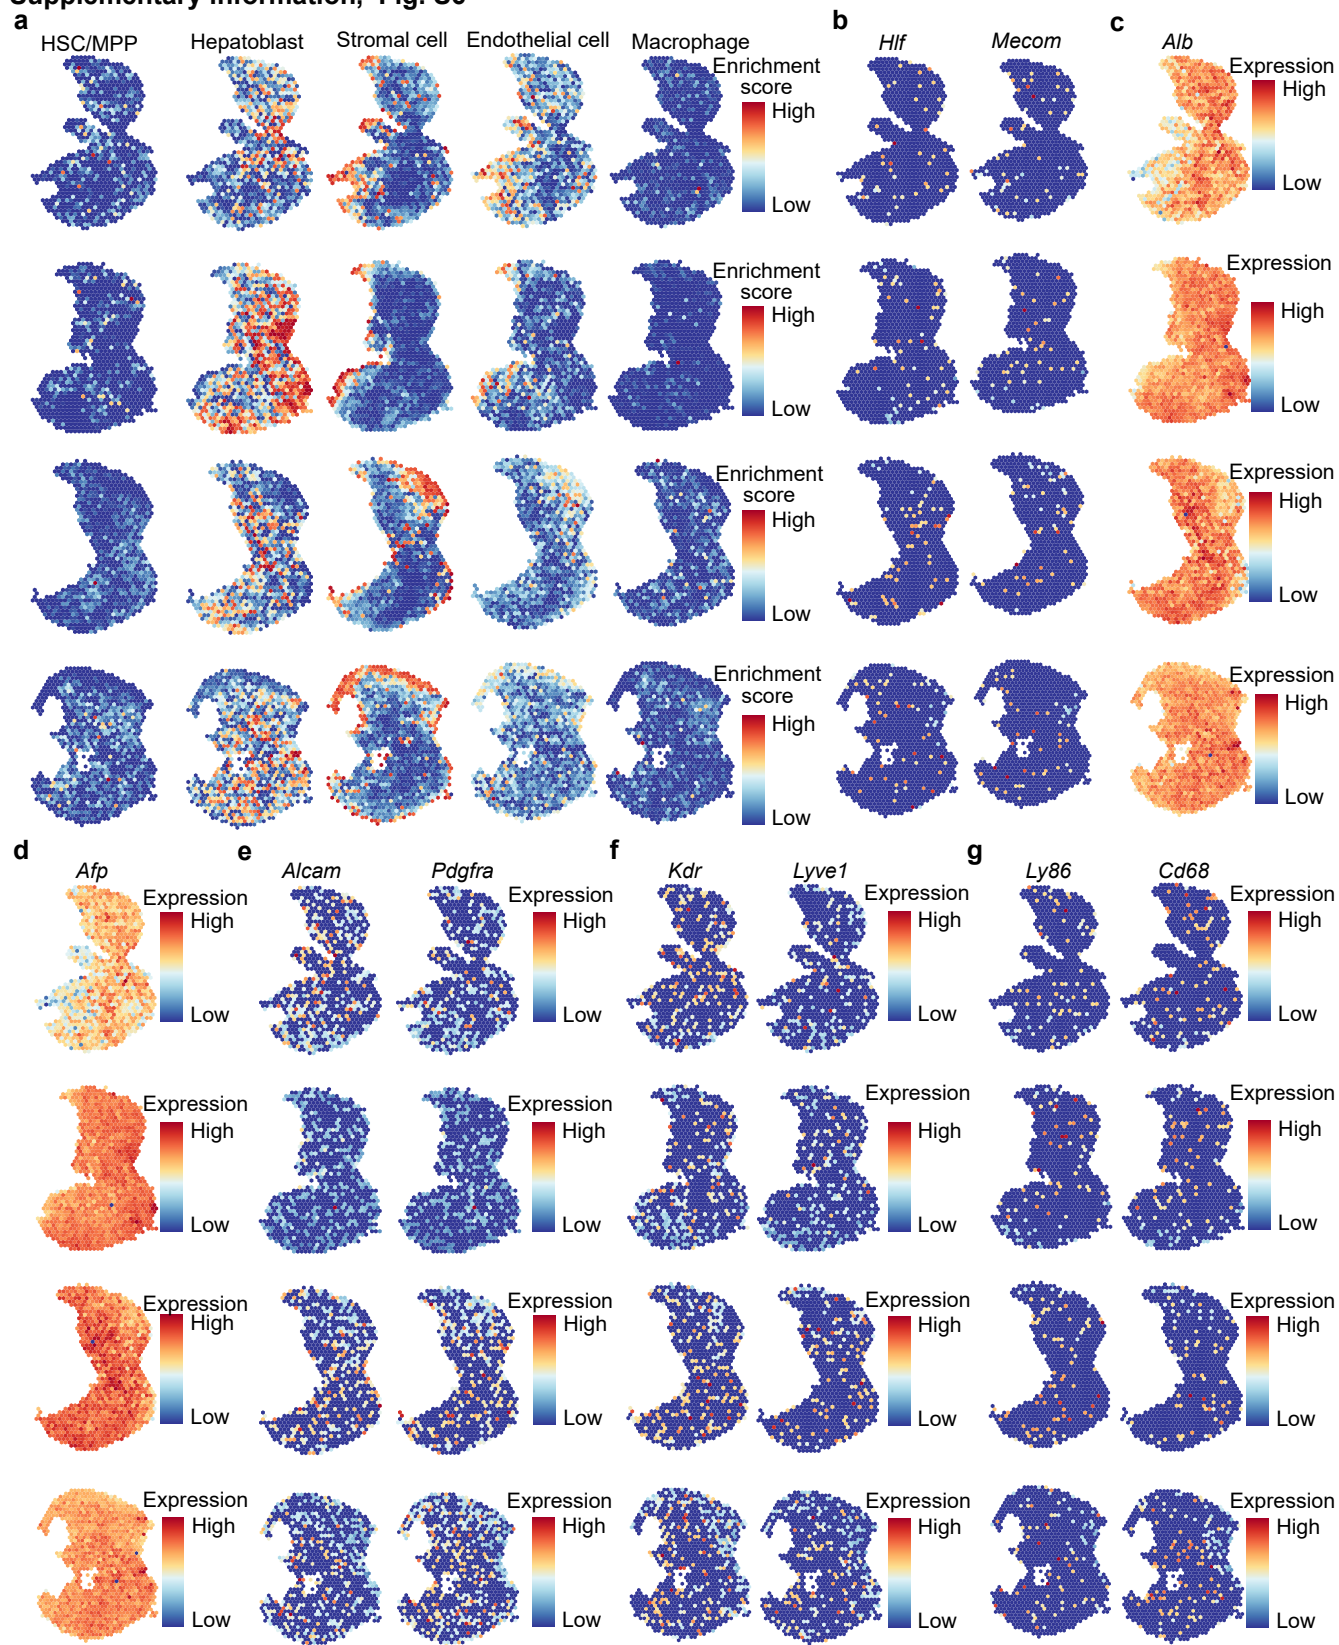

**Supplementary information, Fig. S6. Spatial features of HSCs/MPPs and niche cells. a**

Spatial feature plots showing the spatial enrichment score of HSCs/MPPs and niche cells in FL sections. **b** Expression pattern of HSC/MPP markers *Hlf* and *Mecom* in FL sections. **c** Spatial feature plots of hepatoblast marker *Alb* expression in FL sections. **d** Expression pattern of hepatoblast marker *Afp* in FL sections. **e** Expression pattern of stromal cell markers *Alcam* and *Pdgfra* in FL sections. **f** Expression pattern of EC markers *Kdr* and *Lyve1* in FL sections. **g** Expression pattern of macrophage markers *Ly86* and *Cd68* in FL sections.
