# Supplementary material
Source: PubMed Central journal article supplement (PMC8724330)
Supplement: 41422_2021_540_MOESM7_ESM.pdf [file 41422_2021_540_MOESM7_ESM.pdf]

# Supplementary information, Fig. S7

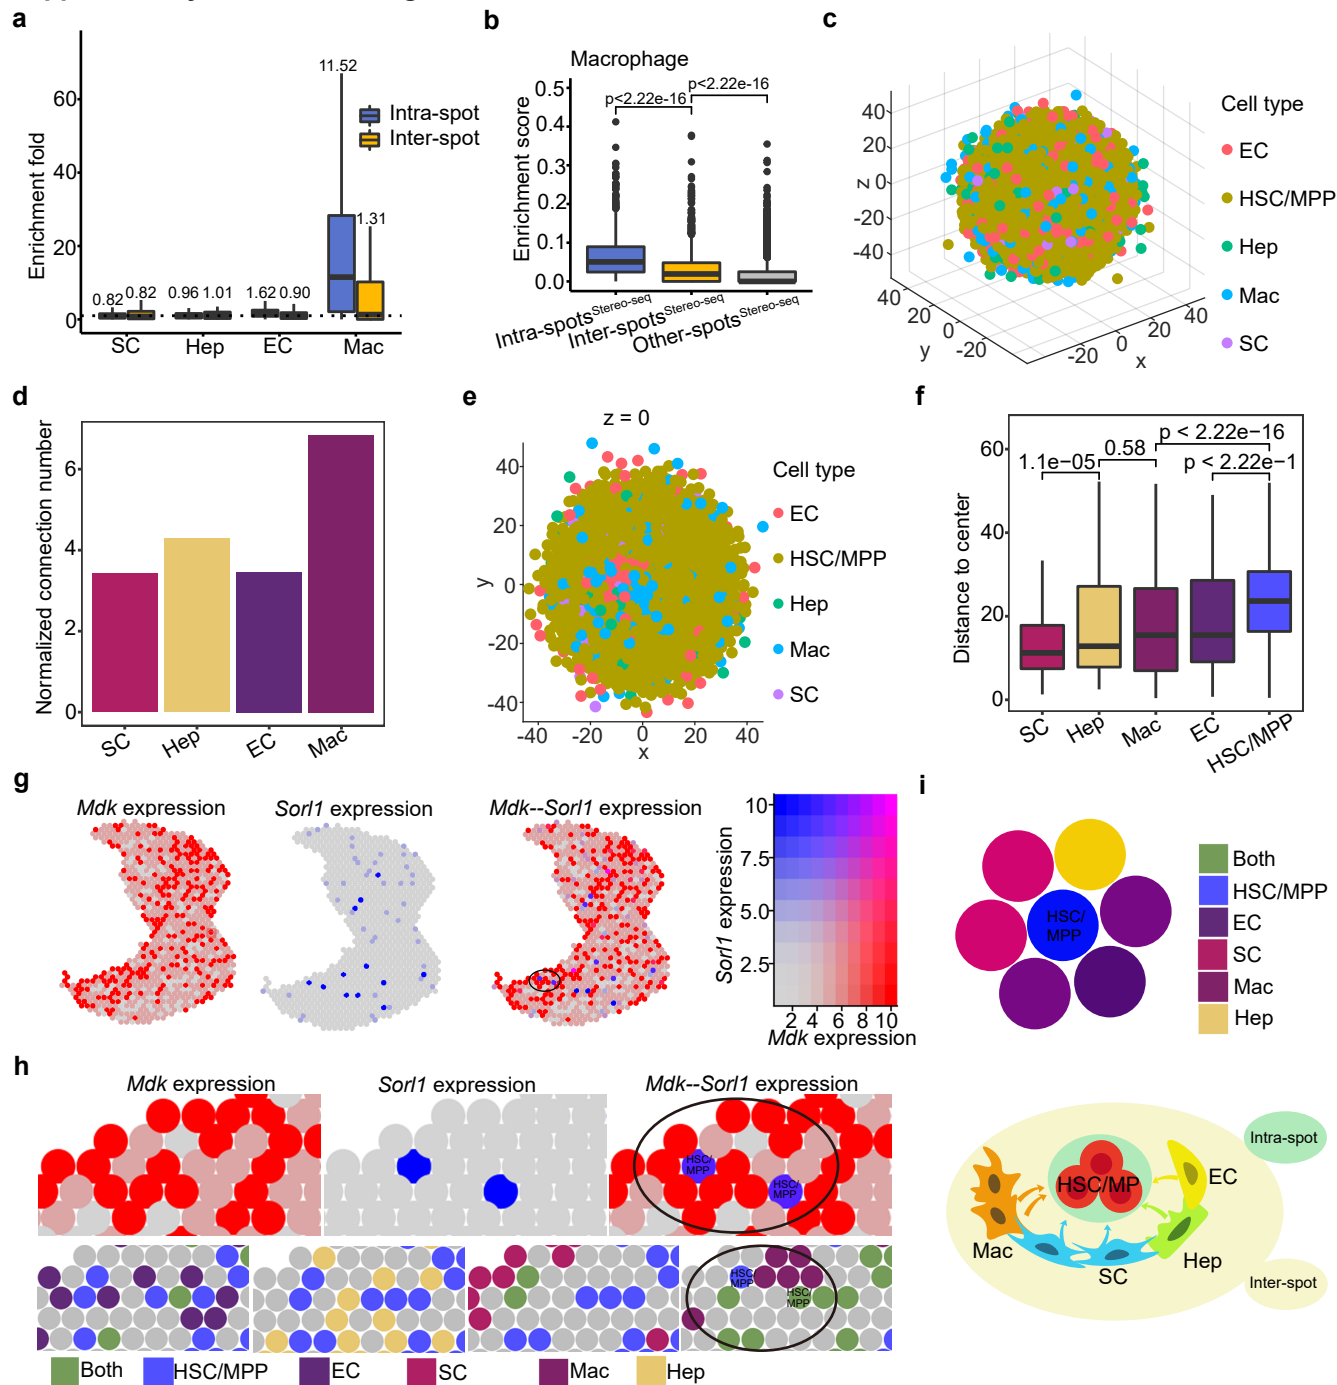

**Supplementary information, Fig. S7. Spatial relationship between HSCs/MPPs and niche cells.** **a** Boxplots showing the enrichment fold of niche cells in intra-spots and inter-spots. Hep, hepatoblast; SC, stromal cell; Mac, macrophage. **b** Boxplots showing the enrichment score of macrophages in intra-spots<sup>Stereo-seq</sup>, inter-spots<sup>Stereo-seq</sup> and Other-spots<sup>Stereo-seq</sup>. **c** The spatial organization of HSCs/MPPs and niche cells in the pseudo-space inferred by CSOmap based on the scRNA-seq data. **d** Normalized connection numbers of interactions between HSCs/MPPs and niche cells. **e** The section view at  $z=0$  in HSCs/MPPs and niche cells. **f** The distance of HSCs/MPPs and niche cells to the center of the pseudo-space. **g** Co-expression pattern of *Mdk* and *Sor11* in FL section. **h** Spatial feature plots of *Mdk-Sor11* enriched HSC/MPP expansion units. **i** Schematic diagram indicating the *Mdk-Sor11* enriched HSC/MPP expansion units.
