# Supplementary material
Source: PubMed Central journal article supplement (PMC8724330)
Supplement: 41422_2021_540_MOESM8_ESM.pdf [file 41422_2021_540_MOESM8_ESM.pdf]

## Supplementary information, Fig. S8

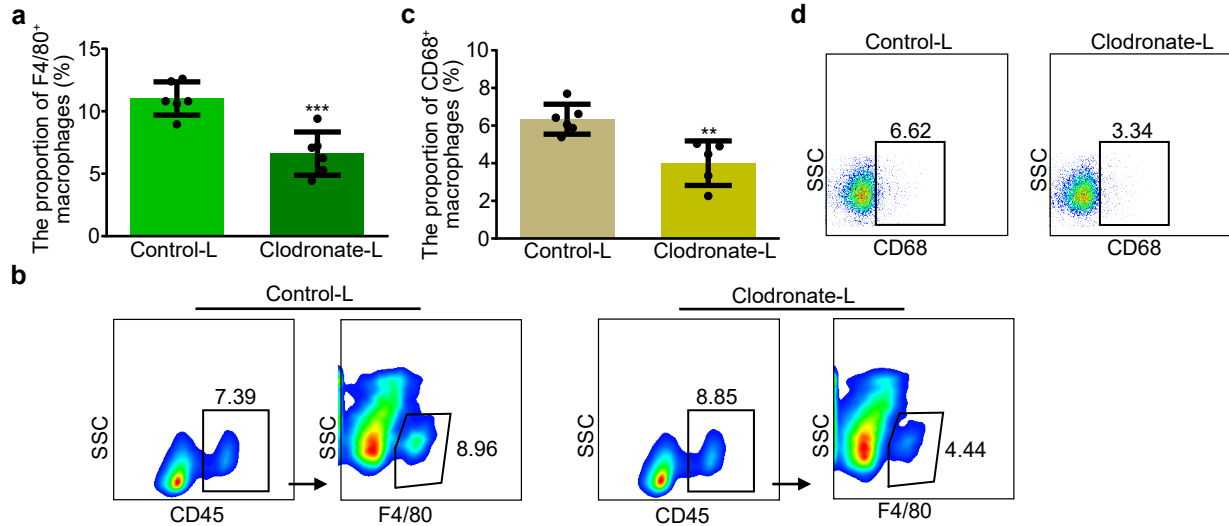

**Supplementary information, Fig. S8. Macrophage depletion upon Clodronate-liposome treatment.** **a** The proportion of macrophages (CD45<sup>+</sup>F4/80<sup>+</sup> cells) in E14.5 FL after Clodronate-liposome and Control-liposome treatment. Clodronate-liposome, Clodronate-L; Control-liposome, Control-L, n > 3 biological replicates. **b** Flow cytometry analysis showing the proportions of CD45<sup>+</sup>F4/80<sup>+</sup> cells in E14.5 FL after Clodronate-liposome and Control-liposome treatment. **c** The proportion of macrophages (CD45<sup>+</sup>CD68<sup>+</sup> cells) in E14.5 FL after Clodronate-liposome and Control-liposome treatment, n > 3 biological replicates. **d** Flow cytometry analysis showing the proportions of CD68<sup>+</sup> cells in E14.5 FL after Clodronate-liposome and Control-liposome treatment. The statistical results are presented as mean ± SEM. Student's t test: \*\*,  $P < 0.01$ ; \*\*\*,  $P < 0.001$ .
