# Supplementary material
Source: PubMed Central journal article supplement (PMC8724330)
Supplement: 41422_2021_540_MOESM9_ESM.pdf [file 41422_2021_540_MOESM9_ESM.pdf]

# Supplementary information, Fig. S9

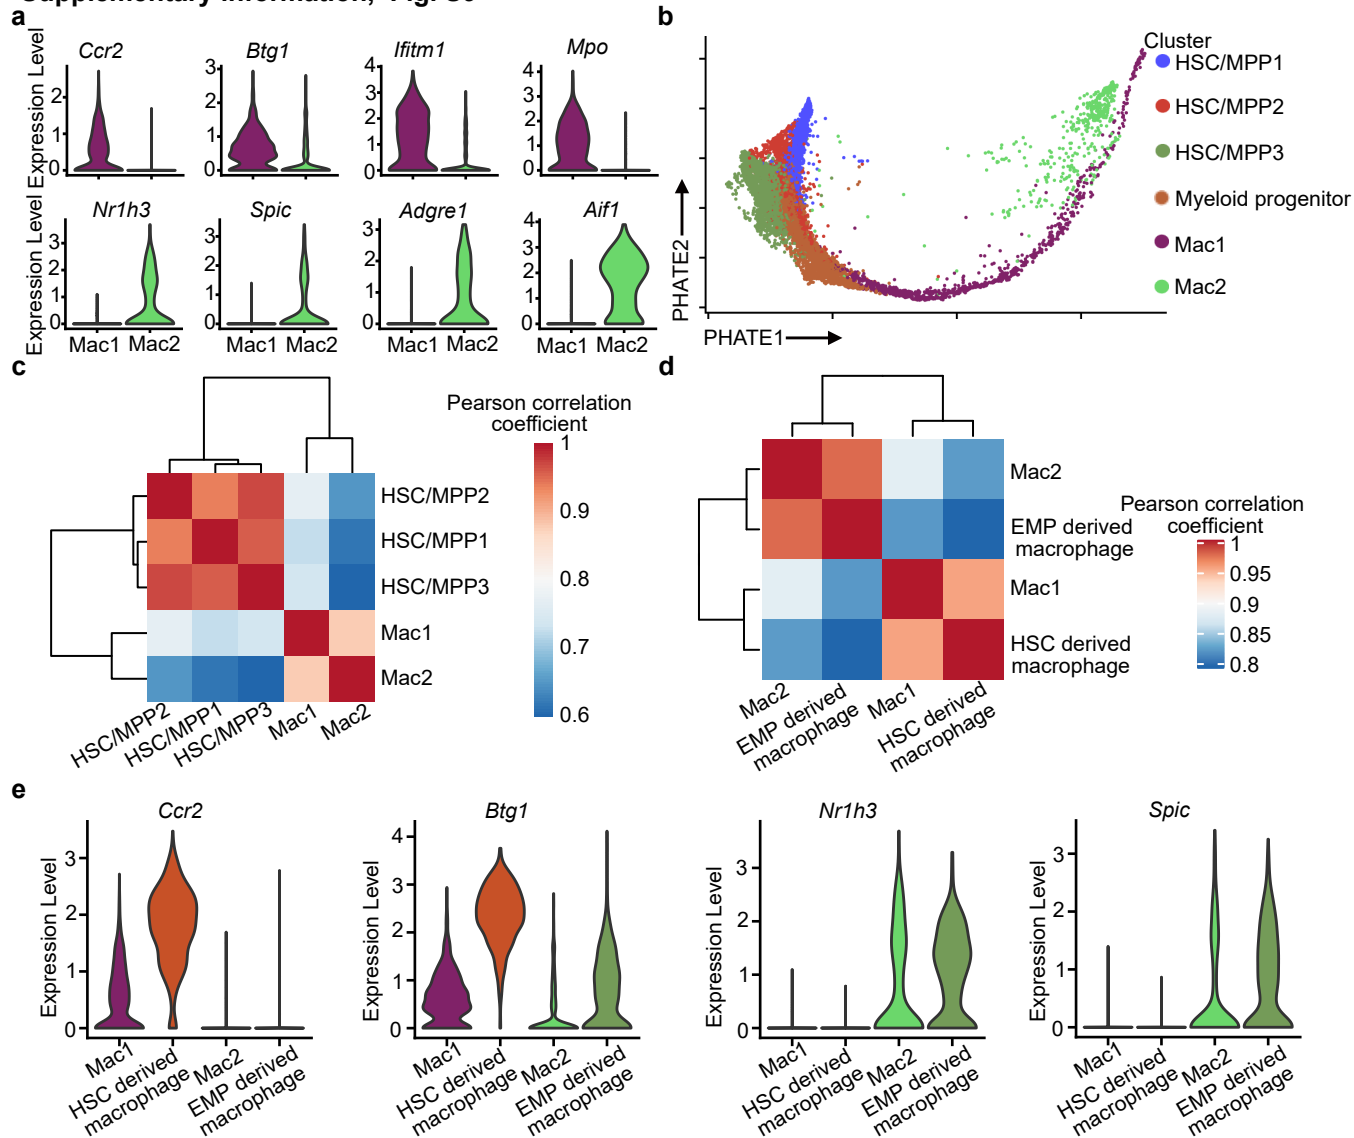

**Supplementary information, Fig. S9. Transcriptomic definition of macrophage1 and macrophage2 with different origins.** **a** Violin plot showing the signature gene expression of Mac1 and Mac2. Mac1, macrophage1; Mac2, macrophage2. **b** Trajectory analysis by PHATE reconstructing the lineage differentiation from HSCs/MPPs and myeloid progenitors to macrophages. **c** Pearson correlation analysis of Mac1, Mac2, HSC/MPP1, HSC/MPP2, and HSC/MPP3. **d** Pearson correlation analysis of Mac1, Mac2, HSC-derived macrophages, and EMP-derived macrophages. EMP, erythro-myeloid progenitors. The transcriptomic data of HSC-derived macrophages and EMP-derived macrophages were derived from the published study<sup>52</sup>. **e** Violin plot showing the signature gene expression of HSC-derived macrophages and EMP-derived macrophages.
