# Supplementary material
Source: PubMed Central journal article supplement (PMC8724330)
Supplement: 41422_2021_540_MOESM10_ESM.pdf [file 41422_2021_540_MOESM10_ESM.pdf]

Supplementary information, Fig. S10

a

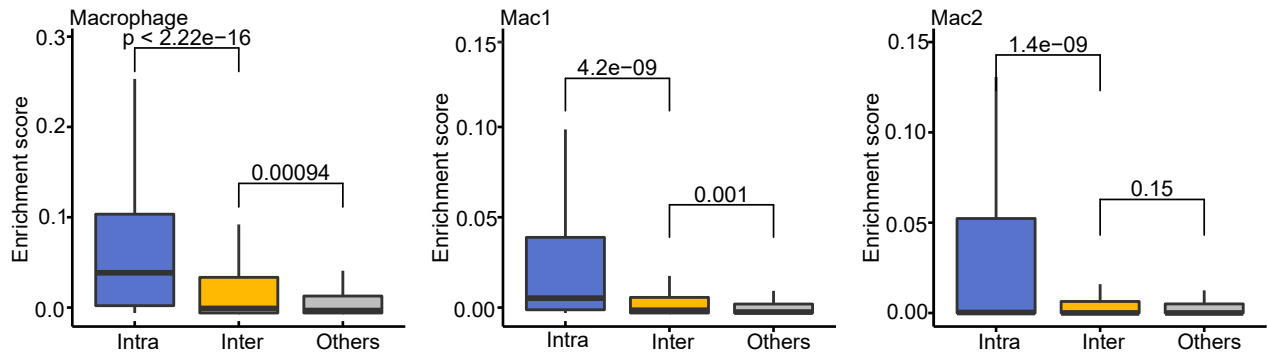

b

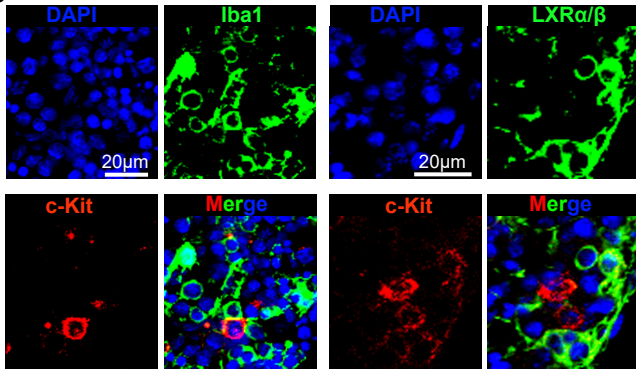

c

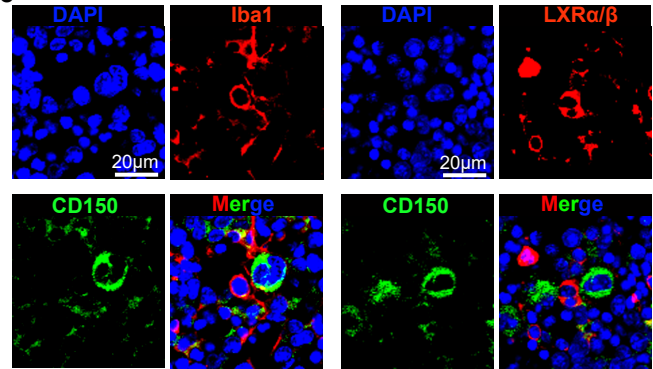

d

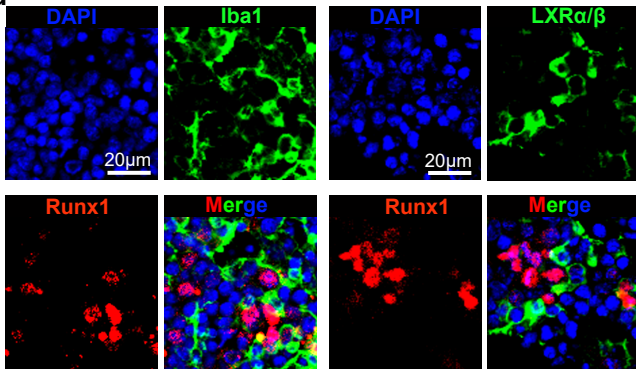

e

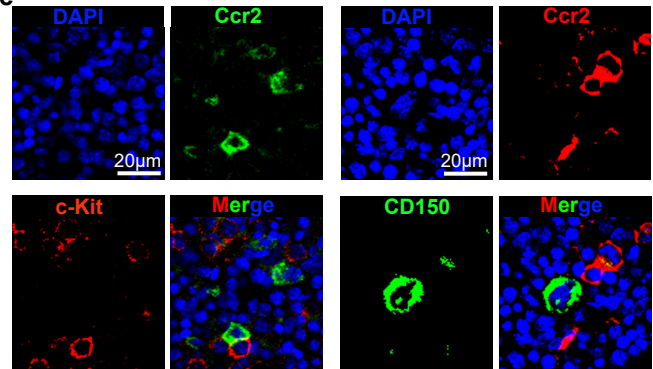

f

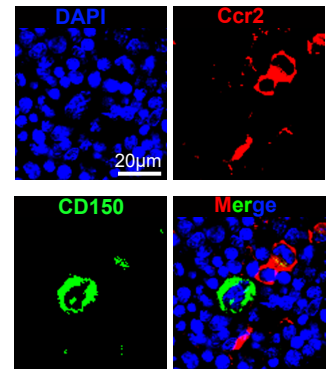

g

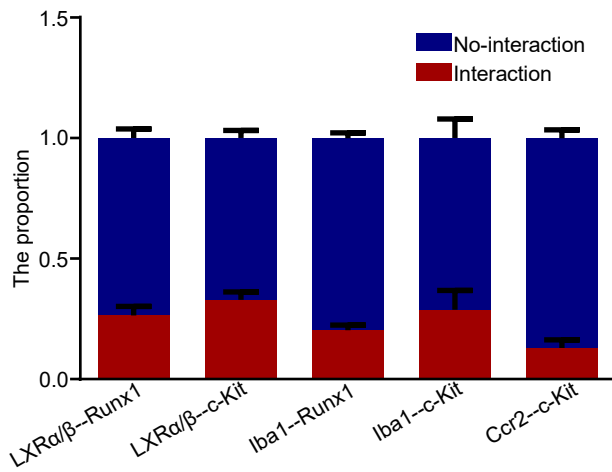

h

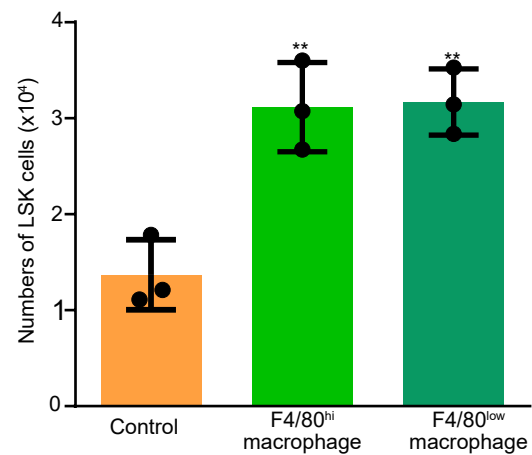

**Supplementary information, Fig. S10. Transcriptomic and functional characterization of macrophage1 and macrophage2.** **a** Boxplots showing the enrichment score of macrophages, Mac1 and Mac2 in intra-spots, inter-spots, and other distant spots. **b** Immunofluorescence analysis showing the expression of Iba1 (representing Mac2), LXR $\alpha/\beta$  (representing Mac2) and c-Kit (representing HSCs/MPPs) in E14.5 FL cryosections. **c** Immunofluorescence analysis showing the expression of Iba1 (representing Mac2), LXR $\alpha/\beta$  (representing Mac2) and CD150 (representing HSCs/MPPs) in E14.5 FL cryosections. **d** Immunofluorescence analysis showing the expression of Iba1 (representing Mac2), LXR $\alpha/\beta$  (representing Mac2) and Runx1 (representing HSCs/MPPs) in E14.5 FL cryosections. **e** Immunofluorescence analysis showing the expression of Ccr2 (representing Mac1) and c-Kit (representing HSCs/MPPs) in E14.5 FL cryosections. **f** Immunofluorescence analysis showing the expression of Ccr2 (representing Mac1) and CD150 (representing HSCs/MPPs) in E14.5 FL cryosections. **g** The proportion of HSCs/MPPs with and without cellular interaction, respectively.  $n > 3$  biological replicates. **h** The number of HSCs/MPPs (LSK cells) derived from macrophage and HSC/MPP co-culture system. F4/80<sup>low</sup> macrophages were CD45<sup>+</sup>CD11b<sup>+</sup>F4/80<sup>low</sup> macrophages, F4/80<sup>high</sup> macrophages were CD45<sup>+</sup>CD11b<sup>low</sup>F4/80<sup>high</sup> macrophages.  $n = 3$  biological replicates. Scale bars, 20  $\mu\text{m}$ . The statistical results are presented as mean  $\pm$  SEM. Student's t test: \*\*,  $P < 0.01$ .
