# Supplementary material
Source: PubMed Central journal article supplement (PMC8724330)
Supplement: 41422_2021_540_MOESM11_ESM.pdf [file 41422_2021_540_MOESM11_ESM.pdf]

Supplementary information, Fig. S11

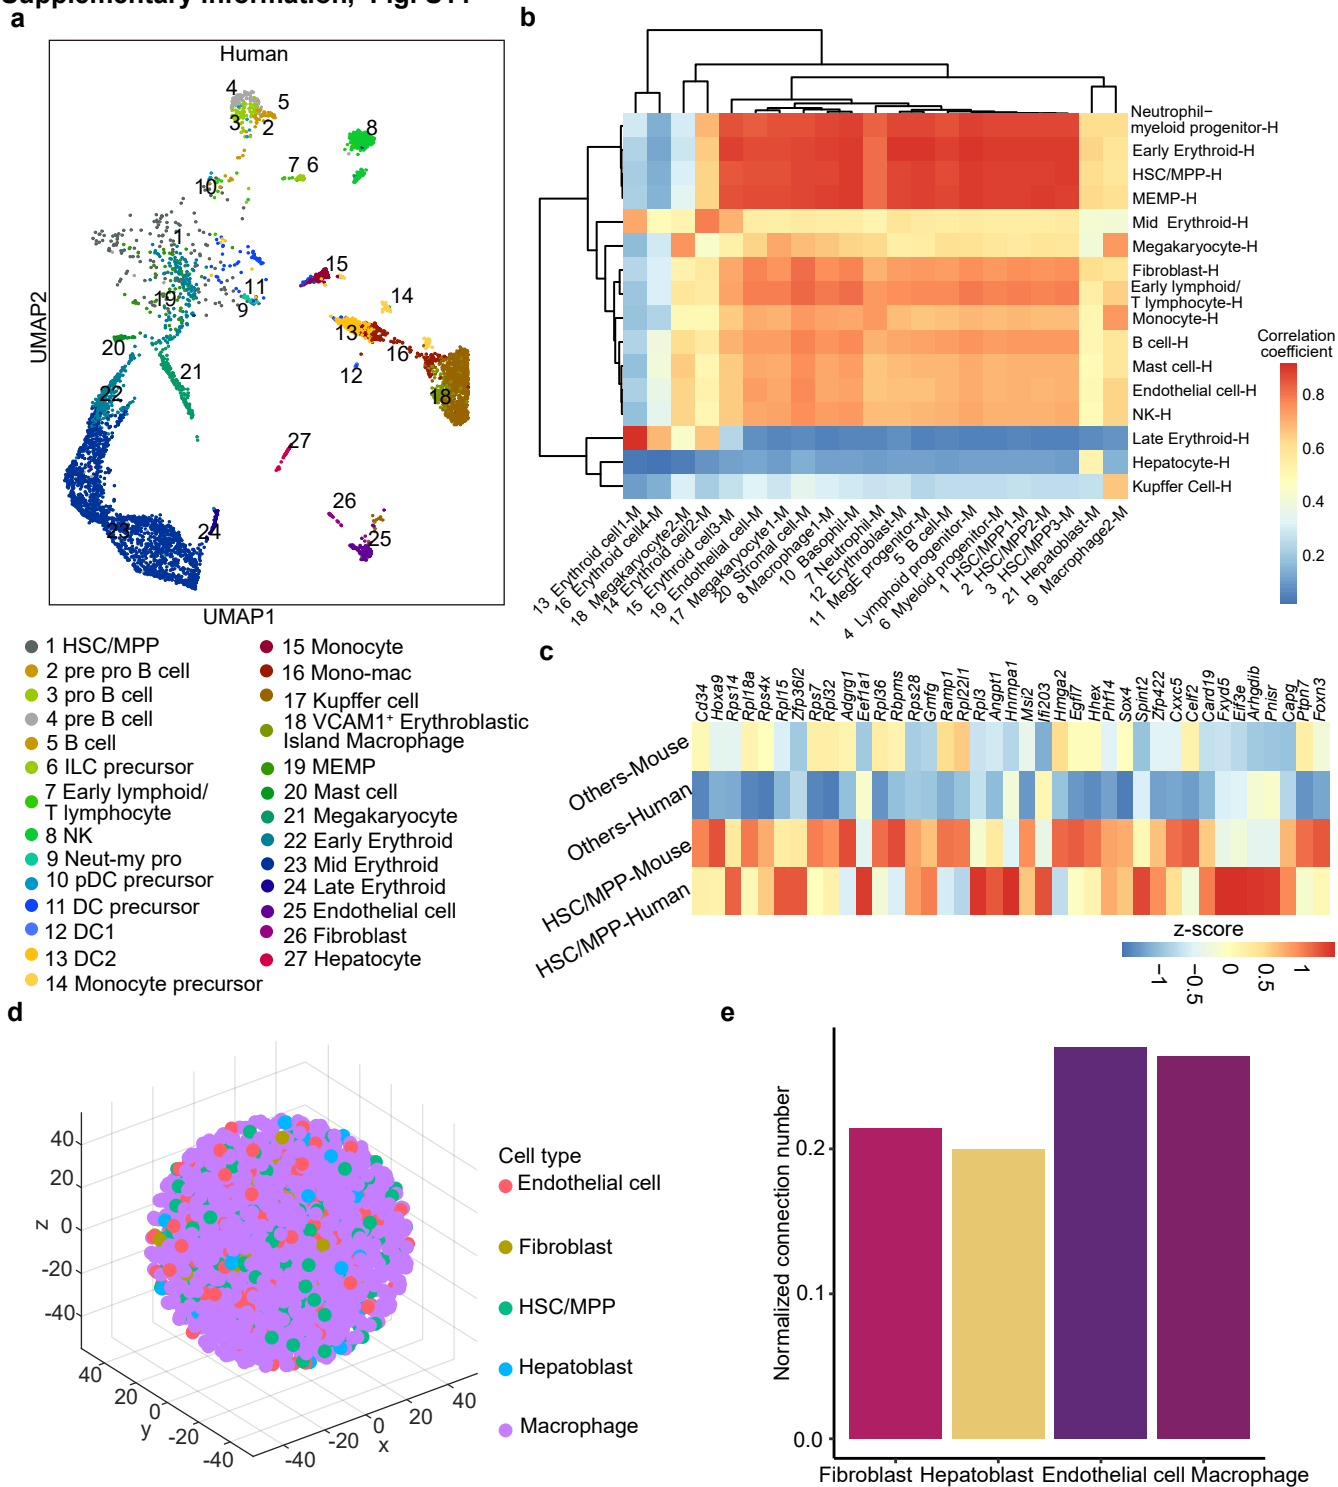

**Supplementary information, Fig. S11. Cross-species analysis of FL hematopoiesis between mice and humans.** **a** UMAP visualization of all cell types in the human FL. Numbers indicate cell types; each dot represents one cell. **b** Pearson correlation analysis of mouse and human FL cell populations. **c** Heatmap showing conserved HSC/MPP signature genes between in humans and mice. **d** The spatial organization of HSCs/MPPs and niche cells in the pseudo-space inferred by CSOmap based on human FL scRNA-seq data. **e** Normalized connection numbers of interactions between HSCs/MPPs and niche cells.
