# Supplementary material
Source: PubMed Central journal article supplement (PMC8724330)
Supplement: 41422_2021_540_MOESM12_ESM.pdf [file 41422_2021_540_MOESM12_ESM.pdf]

## Supplementary information, Fig. S12

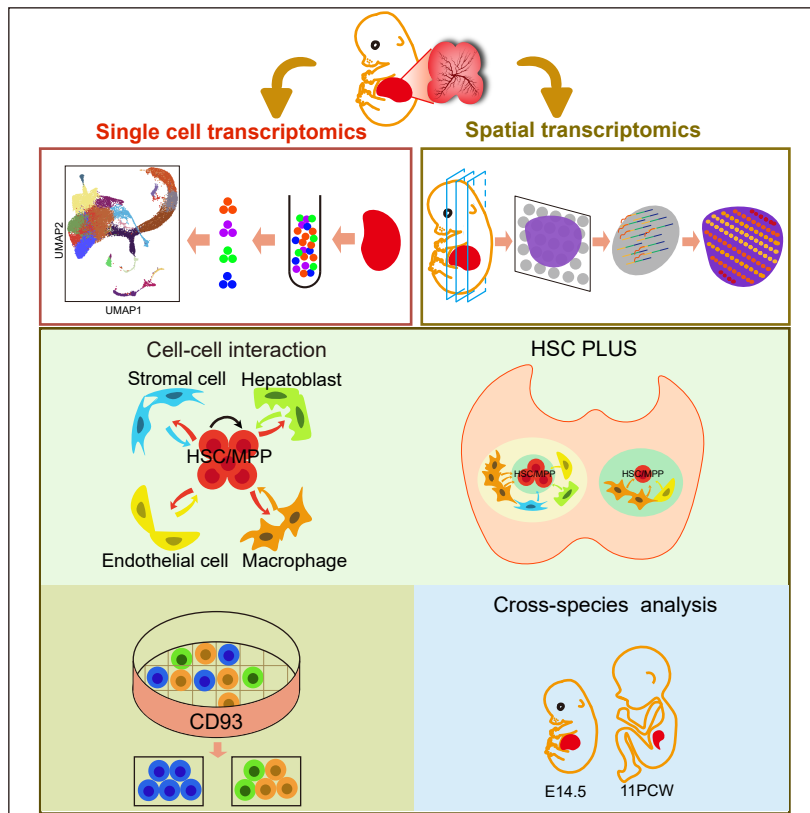

**Supplementary information, Fig. S12. The schematic showing the integration of spatiotemporal transcriptome atlas of FL. HSC/MPP transcriptional heterogeneity, cellular interaction between HSCs/MPPs and niche cells, HSC PLUS, and species-specific/conserved features characterized in this study are shown.**
