# Supplementary material
Source: PubMed Central journal article supplement (PMC8724330)
Supplement: 41422_2021_540_MOESM13_ESM.pdf [file 41422_2021_540_MOESM13_ESM.pdf]

**Supplementary Table 1. List of marker genes used in the present study**

| Cell type        | Gene name                                  |
|------------------|--------------------------------------------|
| HSC/MPP          | <i>Ifitm1, Mecom, Hoxa9, Mycn, Hlf</i>     |
| CMP              | <i>Mpo, Spi1, Cd34, Prtn3, Ccl9</i>        |
| CLP              | <i>Ccr9, Cd7, Notch1, Satb1, Cd79a</i>     |
| MegE             | <i>Gata1, Epor, Klf1, Car1</i>             |
| Erythroid cell   | <i>Hbb-bs, Hbb-bt, Hba-a2, Ermap, Alad</i> |
| Megakaryocyte    | <i>Vwf, Itga2b, Itgb3, Plek, Pf4</i>       |
| Neutrophil       | <i>Gstm1, Elane, Ctsg, Fcnb</i>            |
| Macrophage1      | <i>Cd68, Ly86, Fcgr1, Csf1r, Hmox1</i>     |
| Endothelial cell | <i>Lyve1, Kdr, Sox17, Pecam1, Esam</i>     |
| Stromal cell     | <i>Pdgfra, Alcam, Col1a2, Mmp2, Ncam1</i>  |
| Macrophage2      | <i>Adgre1, Fcgr1, C1qa, Csf1r</i>          |
| Hepatoblast      | <i>Afp, Alb, Ttr, IGFBP1, Hnf4a</i>        |
| B cell           | <i>Blnk, Pax5, Cd19, Ebf1, Vpreb1</i>      |
| Basophil         | <i>Cpa3, Rnase12, Il6, Stx3, Alox15</i>    |
