# Supplementary material
Source: PubMed Central journal article supplement (PMC8724330)
Supplement: 41422_2021_540_MOESM14_ESM.pdf [file 41422_2021_540_MOESM14_ESM.pdf]

**Supplementary Table 2. List of reference genes for hscScore analysis**

|                   |                 |                  |
|-------------------|-----------------|------------------|
| <i>Aqp1</i>       | <i>Gpd2</i>     | <i>Procr</i>     |
| <i>Aqp9</i>       | <i>Gstm1</i>    | <i>Ptpn14</i>    |
| <i>Arhgap27</i>   | <i>Hmnr</i>     | <i>Ramp2</i>     |
| <i>Arhgap5</i>    | <i>Hsp90aa1</i> | <i>Rasa2</i>     |
| <i>Asf1b</i>      | <i>Ifitm1</i>   | <i>Rasal3</i>    |
| <i>Aspm</i>       | <i>Ints2</i>    | <i>Rnf168</i>    |
| <i>Birc5</i>      | <i>Itga2b</i>   | <i>Rrm1</i>      |
| <i>Cacybp</i>     | <i>Kif2c</i>    | <i>Sdf2l1</i>    |
| <i>Ccna2</i>      | <i>Kif4</i>     | <i>Serpina1a</i> |
| <i>Ccne2</i>      | <i>Knstrn</i>   | <i>Sgol1</i>     |
| <i>Cd82</i>       | <i>Limd2</i>    | <i>Sgpp1</i>     |
| <i>Cdca8</i>      | <i>Ltb</i>      | <i>Sh2d3c</i>    |
| <i>Cdk6</i>       | <i>Ly6a</i>     | <i>Sh2d5</i>     |
| <i>Cdkn1c</i>     | <i>Mdm1</i>     | <i>Shc3p1</i>    |
| <i>Cenpf</i>      | <i>Mettl7a1</i> | <i>Ska1</i>      |
| <i>Cenph</i>      | <i>Mfsd2b</i>   | <i>Slc22a3</i>   |
| <i>Cenpi</i>      | <i>Mis18bp1</i> | <i>Smtnl1</i>    |
| <i>Ckap2</i>      | <i>Mki67</i>    | <i>Sox18</i>     |
| <i>Ckap2l</i>     | <i>Mllt3</i>    | <i>Spag5</i>     |
| <i>Cldn10</i>     | <i>Muc13</i>    | <i>Spc24</i>     |
| <i>Csgalnact1</i> | <i>Nasp</i>     | <i>Spred1</i>    |

|               |                 |                |
|---------------|-----------------|----------------|
| <i>Ctsf</i>   | <i>Ncapg</i>    | <i>Sqrdl</i>   |
| <i>Dlgap5</i> | <i>Ndrp1</i>    | <i>Sult1a1</i> |
| <i>Dtnbp1</i> | <i>Neil2</i>    | <i>Syk</i>     |
| <i>Fads3</i>  | <i>Nek2</i>     | <i>Top2a</i>   |
| <i>Fam64a</i> | <i>Neol</i>     | <i>Tor1b</i>   |
| <i>Fgfr3</i>  | <i>Nkg7</i>     | <i>Trim47</i>  |
| <i>Gata1</i>  | <i>Nuf2</i>     | <i>Trip13</i>  |
| <i>Gimap1</i> | <i>Pa2g4</i>    | <i>Ube2c</i>   |
| <i>Gimap6</i> | <i>Pbk</i>      | <i>Ubl3</i>    |
| <i>Gja1</i>   | <i>Pdelb</i>    | <i>Uhrf1</i>   |
| <i>Glpr1</i>  | <i>Pdzk1ip1</i> | <i>Vps18</i>   |
| <i>Gp1bb</i>  | <i>Pf4</i>      | <i>Vwf</i>     |
| <i>Gp5</i>    | <i>Plk1</i>     | <i>Yme1l1</i>  |
