# Supplementary material
Source: PubMed Central journal article supplement (PMC8724330)
Supplement: 41422_2021_540_MOESM15_ESM.pdf [file 41422_2021_540_MOESM15_ESM.pdf]

**Supplementary information Video S1. Demonstration of the mouse FL website.** The visualization of 2D and 3D FL atlas, the expression pattern for all genes, spatial features for all cell types and genes, and the cross-species atlas are shown in the web server.
